# Supplementary material for: Interfacial polymerization of MOF “monomers” to fabricate flexible and thin membranes for molecular separation with ultrafast water transport
Source: Royal Society of Chemistry journal article supplement (doi:10.1039/d1ta04049a), 2021-01-01
Supplement: d1ta04049a1.pdf [file d1ta04049a1.pdf]

## Supplementary Information

### Interfacial Polymerization of MOF “Monomer” to Fabricate Flexible and Thin

#### Membrane for Molecular Separation with Ultrafast Water Transport

Xiaolei Cui<sup>1</sup>, Guodong Kong<sup>1</sup>, Yang Feng<sup>1</sup>, Longting Li<sup>3</sup>, Weidong Fan<sup>1</sup>, Jia Pang<sup>1</sup>, Lili Fan<sup>1</sup>, Rongming Wang<sup>1</sup>, Hailing Guo<sup>3</sup>, Zixi Kang<sup>1,2,\*</sup> and Daofeng Sun<sup>1,\*</sup>

<sup>1</sup> College of Science, School of Materials Science and Engineering, China University of Petroleum (East China), Qingdao, Shandong, 266580, PR China

<sup>2</sup> State Key Laboratory of Structural Chemistry, Fujian Institute of Research on the Structure of Matter, Chinese Academy of Sciences, Fuzhou, Fujian, 350002, PR China.

<sup>3</sup> College of Chemical Engineering, China University of Petroleum (East China), Qingdao, Shandong, 266580, PR China

\*Corresponding authors. Email: [kzx@upc.edu.cn](mailto:kzx@upc.edu.cn); [dfsun@upc.edu.cn](mailto:dfsun@upc.edu.cn)

## Supporting Figures and Tables

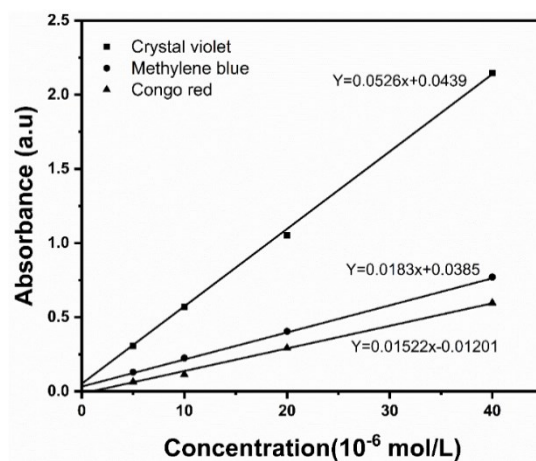

Figure S1. The standard curves of crystal violet, methylene blue and Congo red.

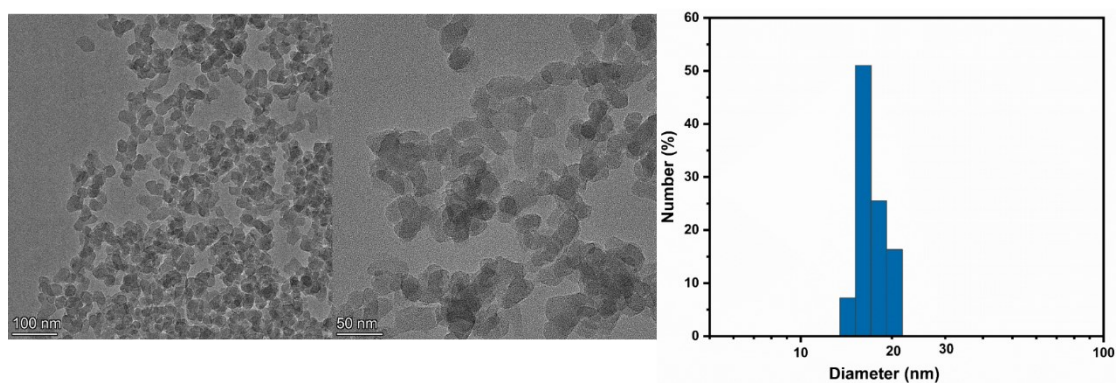

Figure S2. TEM and size statistics of S-UiO-66-NH<sub>2</sub>.

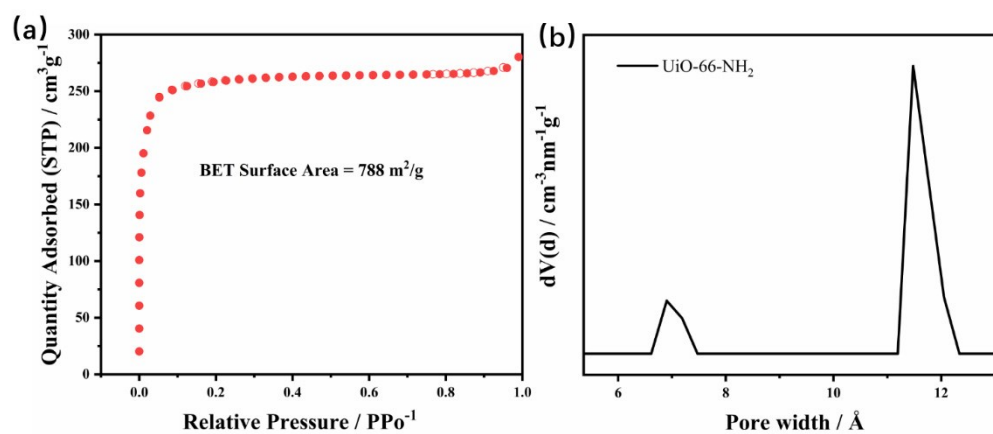

Figure S3. The N<sub>2</sub> adsorption results: (a) the N<sub>2</sub> adsorption-desorption isotherms and BET surface area at 77 K for UiO-66-NH<sub>2</sub> “monomer”, (b) the pore size distribution of UiO-66-NH<sub>2</sub> “monomer”.

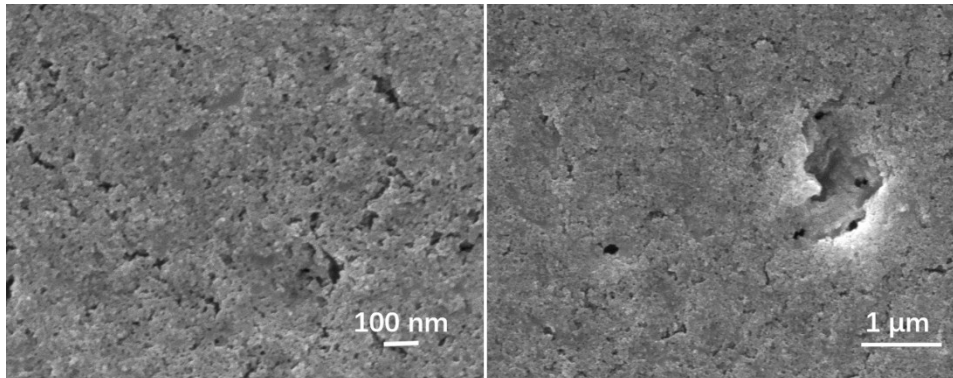

**Figure S4.** SEM images of the UiO-66-NH<sub>2</sub>-TMC membrane fabricated by conventional liquid-liquid interface polymerization method in the preliminary experiment.

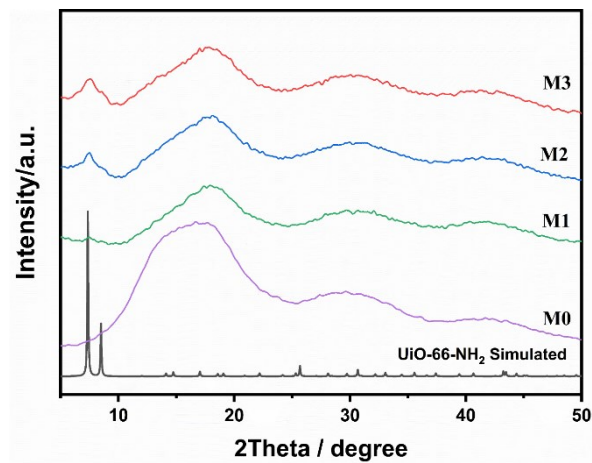

**Figure S5.** XRD of UiO-66-NH<sub>2</sub>-TMC membranes. M0: PES substrate; M1, M2, M3: membranes prepared with UiO-66-NH<sub>2</sub> “monomer” concentrations of 0.03 wt%, 0.05 wt% and 0.1 wt% respectively.

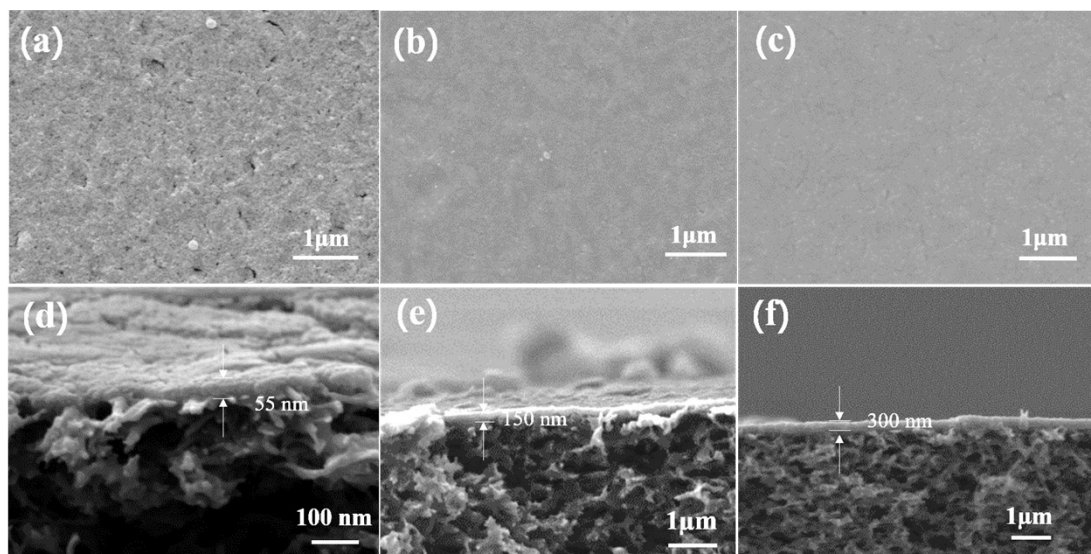

**Figure S6.** The top-view and cross-section SEM images of (a, d) M1, (b, e) M2 and (c, f) M3.

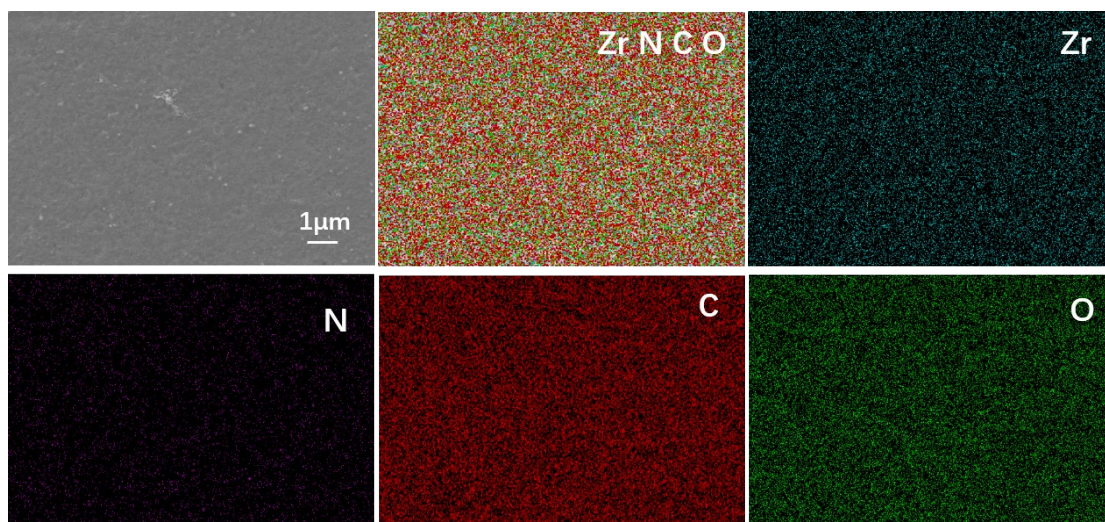

**Figure S7.** EDS mapping images of UiO-66-NH<sub>2</sub>-TMC membrane.

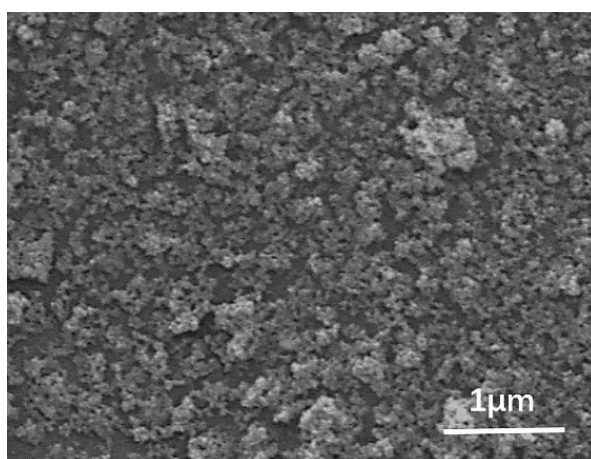

**Figure S8.** The top-view SEM image of UiO-66-TMC membrane.

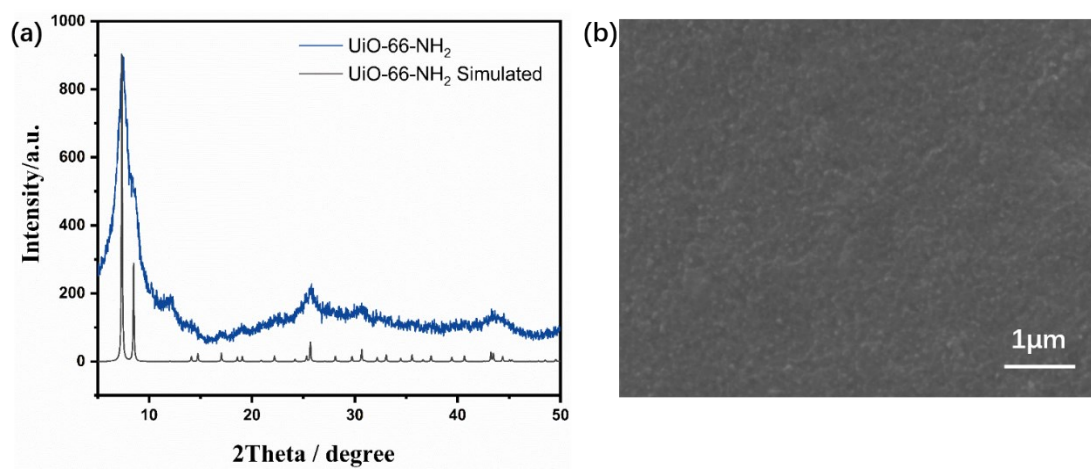

**Figure S9.** (a) The PXR D pattern of UiO-66-NH<sub>2</sub> after soaked in water for 30 days; (b) SEM image of the membrane prepared with the UiO-66-NH<sub>2</sub> after soaked in water for 30 days.

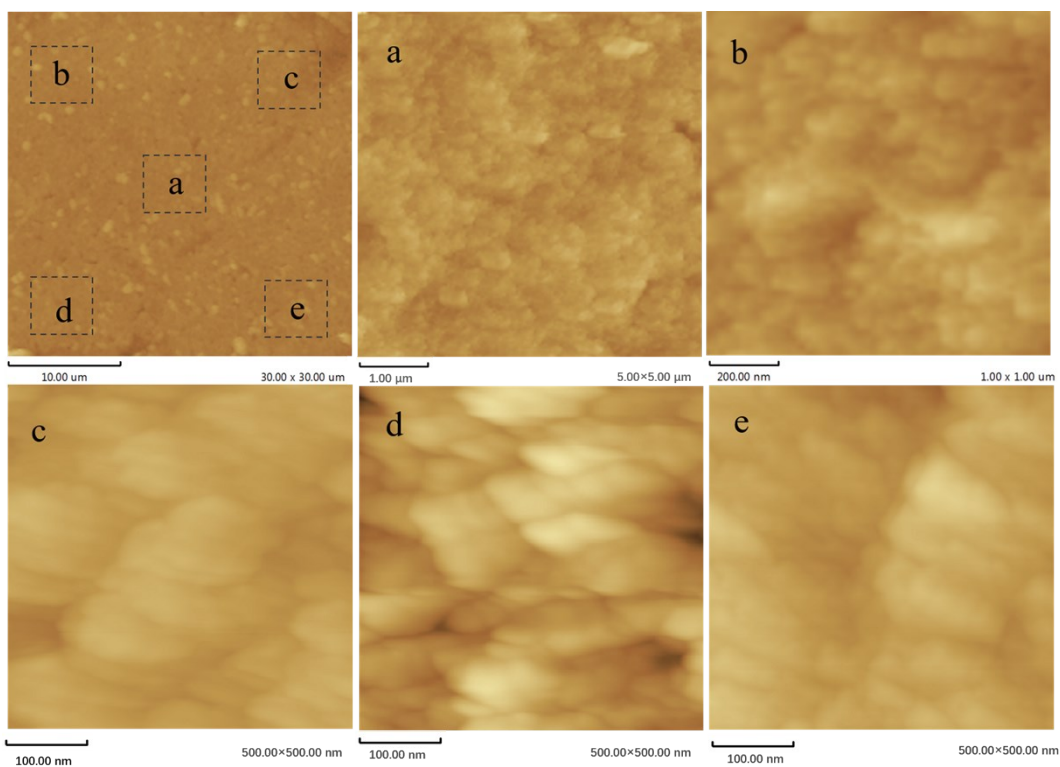

**Figure S10.** The AFM images of M2 and magnified of region a-e in M2.

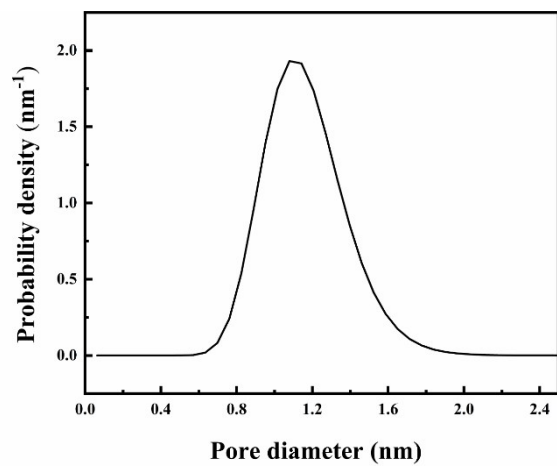

**Figure S11.** The pore size distribution of UiO-66-NH<sub>2</sub>-TMC membrane.

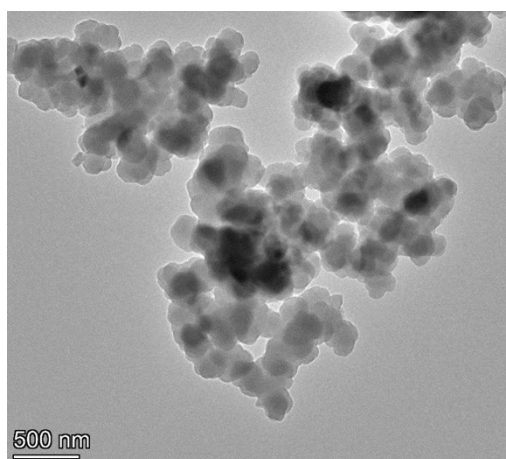

**Figure S12.** TEM of the L-UiO-66-NH<sub>2</sub>.

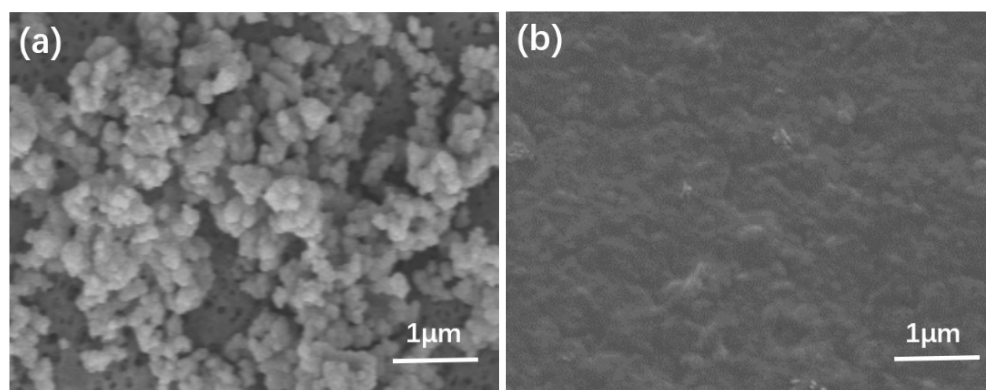

**Figure S13.** The top-view SEM images of (a) L-UiO-66-NH<sub>2</sub>-TMC membrane and (b) M2 membrane.

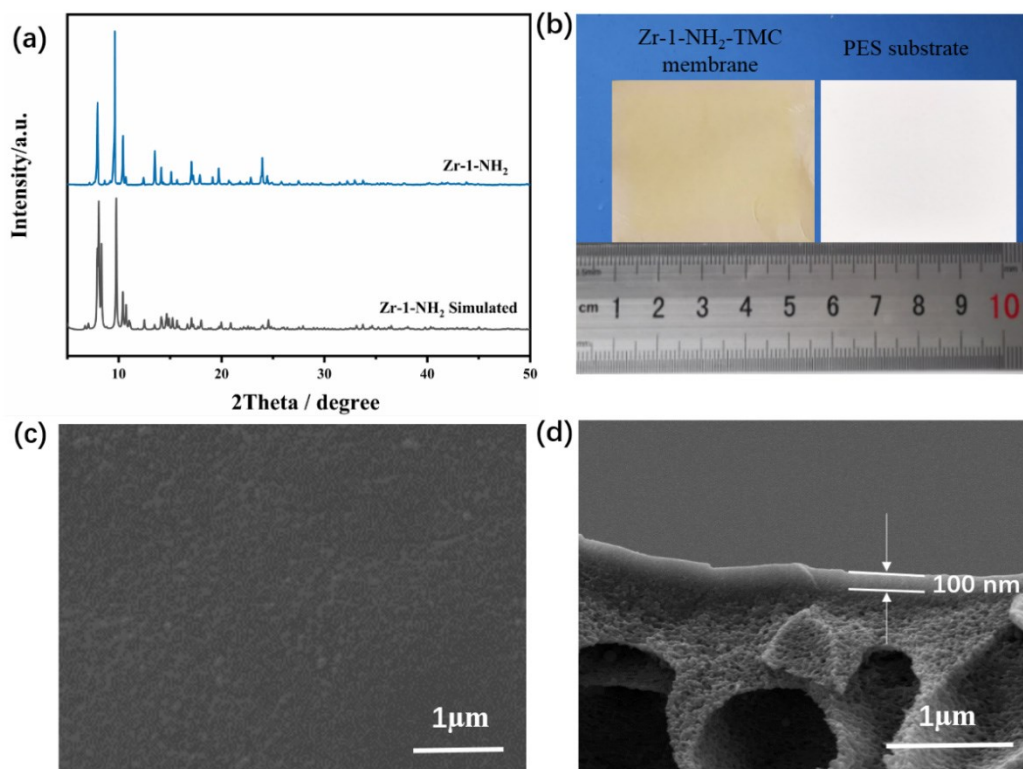

**Figure S14.** (a) PXRD of Zr-1-NH<sub>2</sub> “monomer”, (b) photograph of Zr-1-NH<sub>2</sub>-TMC membrane and PES substrate, (c) the top-view SEM image of Zr-1-NH<sub>2</sub>-TMC membrane, (d) the cross-section SEM image of the Zr-1-NH<sub>2</sub>-TMC membrane.

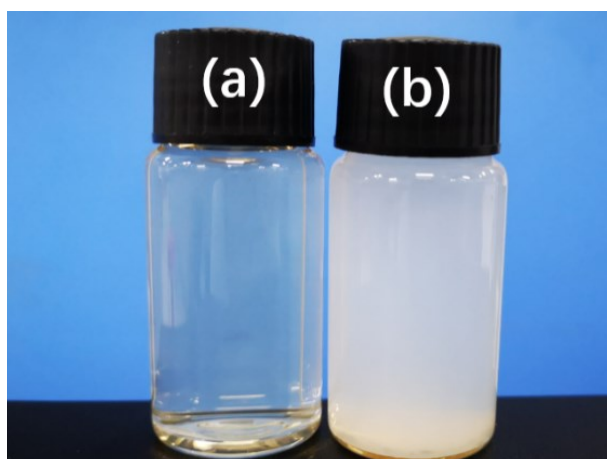

**Figure S15.** (a) UiO-66-NH<sub>2</sub> “monomer” diluted directly in deionized water after synthesis, (b) UiO-66-NH<sub>2</sub> “monomer” was dried and then diluted in deionized water after synthesis.

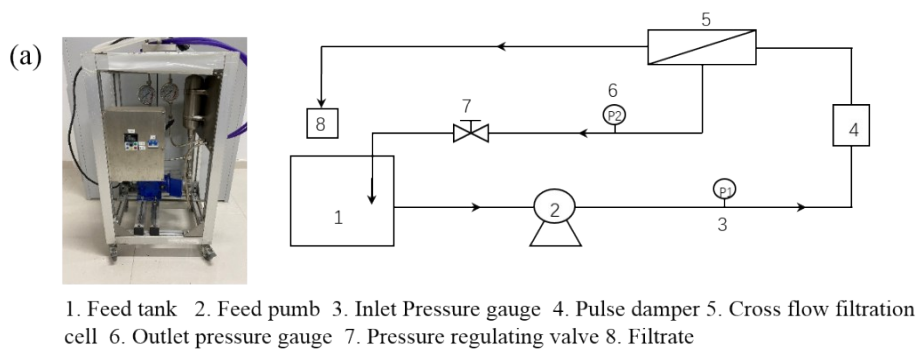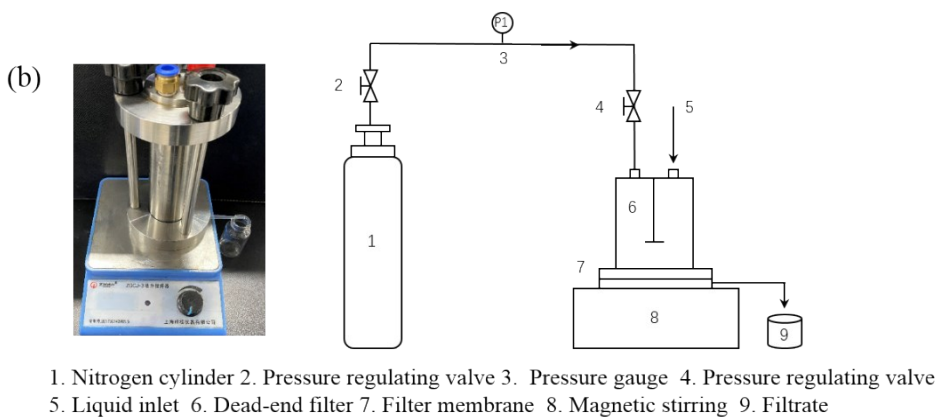

**Figure S16.** Photograph and schematic illustration of nanofiltration devices for (a) cross-flow mode and (b) dead-end mode.

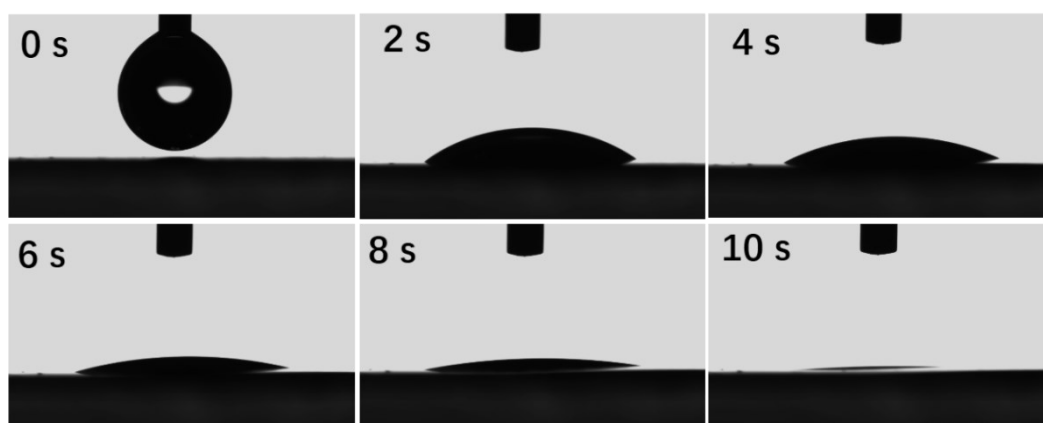

**Figure S17.** The water contact angle of M2 changes with time.



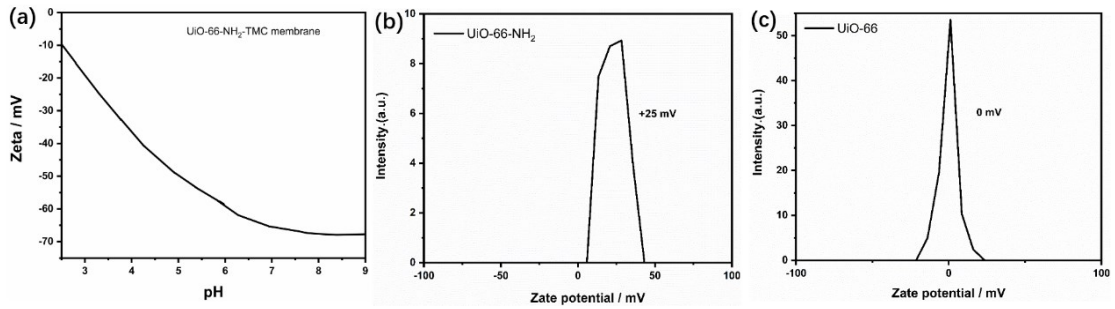

**Figure S18.** Zeta potential of (a) UiO-66-NH<sub>2</sub>-TMC membrane as a function of solution pH, (b) UiO-66-NH<sub>2</sub> "monomer" aqueous solution and (c) UiO-66 aqueous solution.

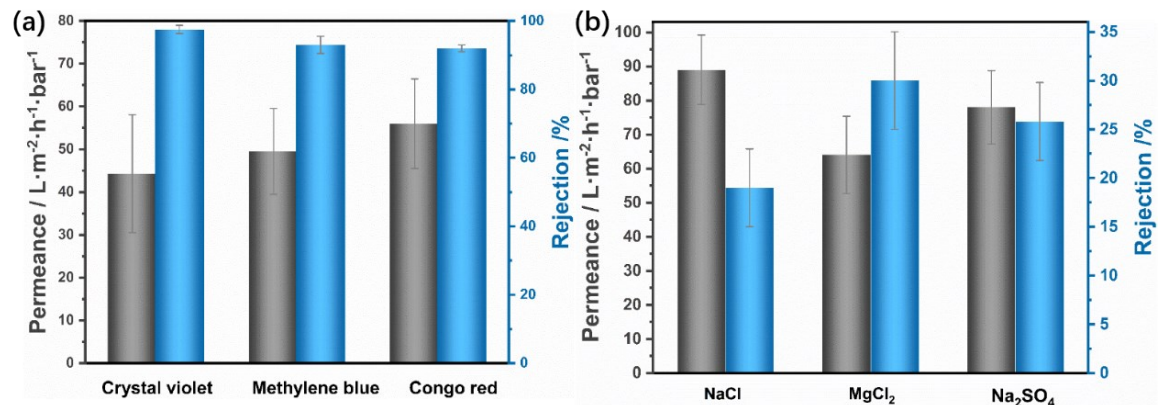

**Figure S19.** The nanofiltration performance of (a) three dyes (50 ppm) and (b) three salt solutions (1000 ppm) on M2.

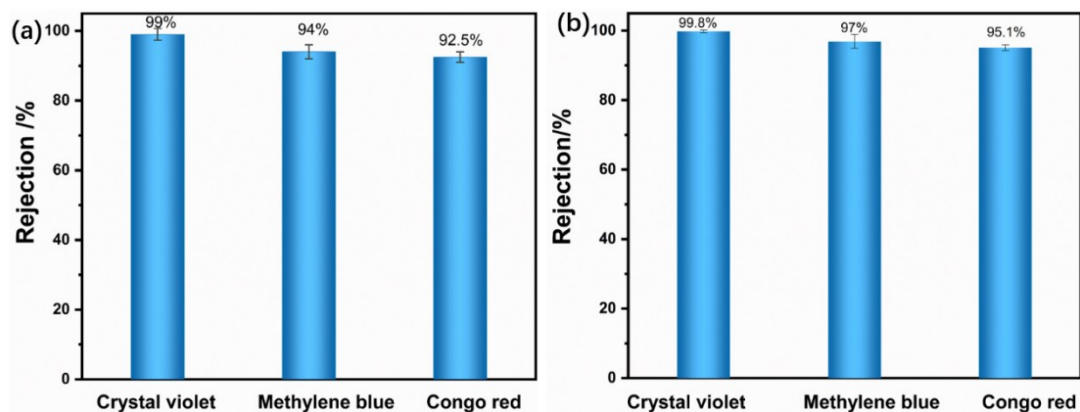

**Figure S20.** The nanofiltration performance of M2 under the (a) dye interference (mixture of 10 ppm crystal violet, methylene blue and Congo red) and (b) organic matter interference (10 ppm crystal violet, methylene blue, Congo red and 0.1g L<sup>-1</sup> BSA).

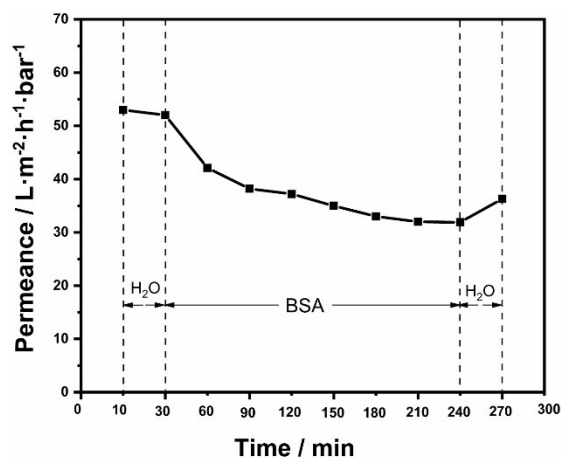

**Figure S21.** Time-dependent permeance for M2 membrane during filtration of BSA.

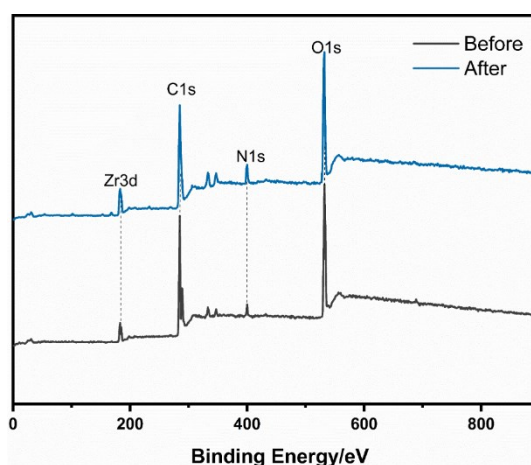

**Figure S22.** The XPS results for the M2 before and after nanofiltration test.

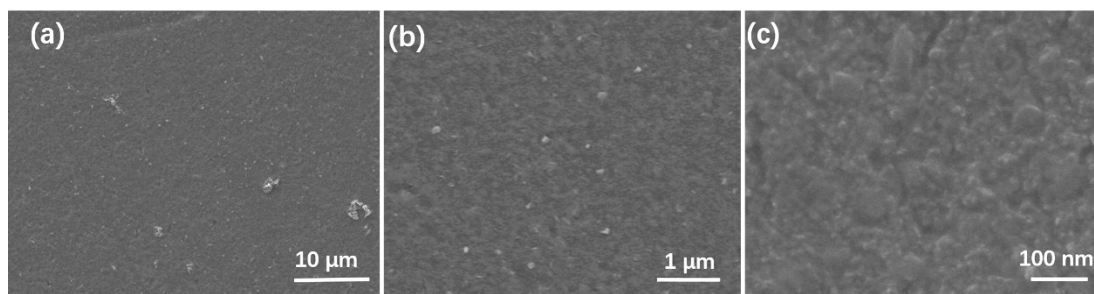

**Figure S23.** SEM images with different magnification for the UiO-66-NH<sub>2</sub>-TMC membrane after bending test.

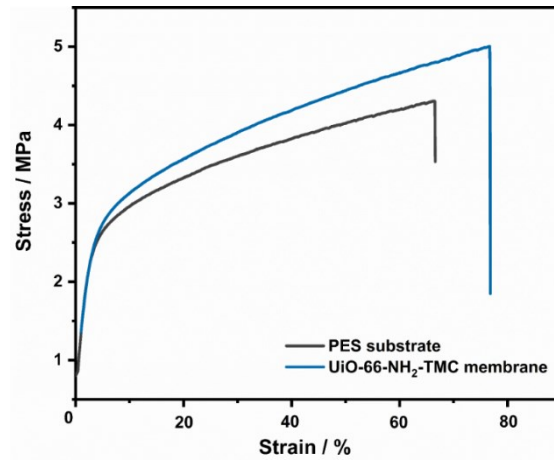

**Figure S24.** The tensile tests of UiO-66-NH<sub>2</sub>-TMC and PES membrane.

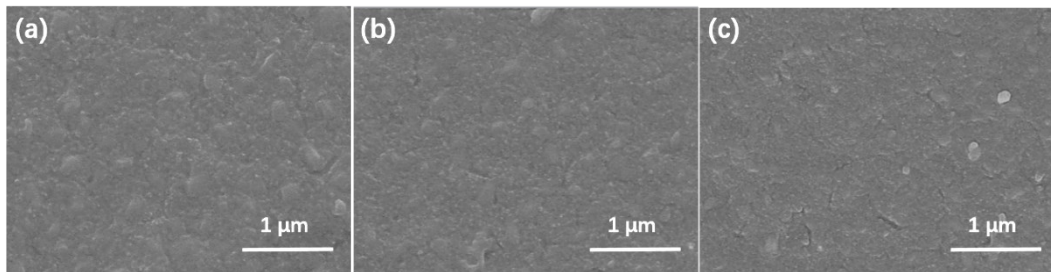

**Figure S25.** The top-view SEM images of region a-c in the large-area membrane.

**Table S1.** MOF ratio in the composite membrane

| Membrane | MOF mass (g) | TMC mass(g) | MOF ratio (%) |
|----------|--------------|-------------|---------------|
| M1       | 0.00086      | 0.00222     | 27.9          |
| M2       | 0.00295      | 0.00234     | 55.8          |
| M3       | 0.00760      | 0.00290     | 72.4          |

**Table S2.** Cost estimate of UiO-66-NH<sub>2</sub>-TMC selective layer.

|                              | UiO-66-NH <sub>2</sub>   |                   | TMC | cyclohexane |
|------------------------------|--------------------------|-------------------|-----|-------------|
|                              | 2-aminoterephthalic acid | ZrCl <sub>4</sub> |     |             |
| Price (USD g <sup>-1</sup> ) | 1.7                      | 2.2               | 4.3 | 2           |
| Dosage (g m <sup>-2</sup> )  | 0.7                      | 1                 | 5.7 | 1100        |
| Cost (USD m <sup>-2</sup> )  | 1                        | 2                 | 25  | 2           |
| Total (USD m <sup>-2</sup> ) |                          | 30                |     |             |

**Table S3.** The structural properties of dye molecules in this study.

|                                 | Crystal violet                                                                      | Methylene blue                                                                       | Congo Red                                                                             |
|---------------------------------|-------------------------------------------------------------------------------------|--------------------------------------------------------------------------------------|---------------------------------------------------------------------------------------|
| Chemical structure              | 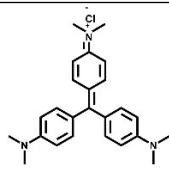 |  |  |
| Size (Å)                        | 13.05×13.05                                                                         | 13.17×5.27                                                                           | 25.60×7.30                                                                            |
| Mol. wt. (g mol <sup>-1</sup> ) | 373.53                                                                              | 319.85                                                                               | 696.68                                                                                |
| Charge                          | Positive                                                                            | Positive                                                                             | Negative                                                                              |

**Table S4.** The content of Zr in feed and permeate solution.

| Solution | Measured element | Contents (mg/L) | Dissolved MOF (mg) |
|----------|------------------|-----------------|--------------------|
| Feed     | Zr               | 0.0045±0.0015   | 0.00042±0.00014    |
| Permeate | Zr               | 0.0057±0.0009   | 0.00053±0.00008    |

**Table S5.** The water permeance and dye rejection rate of reported membranes.

| Membrane                           | Dye                             | Water permeance<br>(L m <sup>-2</sup> h <sup>-1</sup> bar <sup>-1</sup> ) | Rejection<br>rate<br>(%) | Reference |
|------------------------------------|---------------------------------|---------------------------------------------------------------------------|--------------------------|-----------|
| PA/UiO-66                          | Rose Bengal                     | 15.4                                                                      | 100                      | 1         |
| PA/UiO-66                          | Azithromycin                    | 15.4                                                                      | 97.6                     | 1         |
| PM TFN membrane                    | Methyl blue                     | 13.09                                                                     | 99.9                     | 2         |
| PA/ZIF-8                           | Congo red                       | 2.71                                                                      | 99.8                     | 3         |
| UiO-66/PGP                         | Methyl orange                   | 31.33                                                                     | 94.84                    | 4         |
| Zif-8/PSS                          | Methyl blue                     | 26.5                                                                      | 98.6                     | 5         |
| UiO-66                             | Methyl blue                     | 0.77                                                                      | 99.8                     | 6         |
| ZIF-8                              | Rose Bengal                     | 37.5                                                                      | 98                       | 7         |
| UiO-66-NH <sub>2</sub> -based MMMs | Rhodamine B                     | 34                                                                        | 92                       | 8         |
| ZIF-8/PEI hybrid membrane          | Methyl blue                     | 33                                                                        | 99.6                     | 9         |
| ZIF-8/PES                          | Rose bengal                     | 1.3                                                                       | 99                       | 10        |
| UiO-66@GO/PES                      | Methyl orange                   | 15.7                                                                      | 88.6                     | 11        |
| UiO-66-(COOH)/prGO                 | Methylene blue                  | 20                                                                        | 92.55                    | 12        |
| Sm-MOF/GO                          | Rrhodamine B and Methylene blue | 26                                                                        | >91%                     | 13        |
| PA-ZIF-93                          | Acridine orange                 | 0.24                                                                      | 98                       | 14        |
| BUT-8/PEI-HPAN-50                  | Methylene blue                  | 51                                                                        | 98.3                     | 15        |
| UiO-66-NH <sub>2</sub> -TMC        | Crystal violet                  | 55.9                                                                      | 99.8                     | This work |

## Supporting references

- 1 X. Cheng, X. Jiang, Y. Zhang, C. H. Lau, Z. Xie, D. Ng, S. J. D. Smith, M. R. Hill and L. Shao, *ACS Appl. Mater. Interfaces* 2017, **9**, 38877-38886.
- 2 P. Zhao, R. Li, W. Wu, J. Wang, J. Liu and Y. Zhang, *Compos. B. Eng.* 2019, **176**, 107208.
- 3 L. Wang, M. Fang, J. Liu, J. He, J. Li and J. Lei, *ACS Appl. Mater. Interfaces* 2015, **7**, 24082-24093.
- 4 S. Y. Fang, P. Zhang, J. L. Gong, L. Tang, G. M. Zeng, B. Song, W. C. Cao, J. Li and J. Ye, *Chem. Eng.J.* 2020, **385**, 123400.
- 5 R. Zhang, S. Ji, N. Wang, L. Wang, G. Zhang and J.R. Li, *Angew. Chem. Int. Ed.* 2014, **53**, 9775-9779.
- 6 X. Wang, L. Zhai, Y. Wang, R. Li, X. Gu, Y. D. Yuan, Y. Qian, Z. Hu and D. Zhao, *ACS Appl. Mater. Interfaces* 2017, **9**, 37848-37855.
- 7 Y. Li, L. H. Wee, J. A. Martens and I. F. J. Vankelecom, *J. Membr. Sci.* 2017, **523**, 561-566.
- 8 F. Aghili, A. A. Ghoreyshi, A. Rahimpour and B. Van der Bruggen, *Ind. Eng. Chem. Res.* 2020, **59**, 7825-7838.
- 9 L. Yang, Z. Wang and J. Zhang, *J. Membr. Sci.* 2017, **532**, 76-86.
- 10 Y. Li, L. H. Wee, A. Volodin, J. A. Martens and I. F. J. Vankelecom, *ChemComm* 2015, **51**, 918.
- 11 J. Ma, X. Guo, Y. Ying, D. Liu and C. Zhong, *Chem. Eng.J.* 2017, **313**, 890-898.
- 12 P. Zhang, J. L. Gong, G. M. Zeng, B. Song, H. Y. Liu, S. Y. Huan and J. Li, *Chemosphere* 2018, **204**, 378-389.
- 13 G. Yang, D. Zhang, G. Zhu, T. Zhou, M. Song, L. Qu, K. Xiong and H. Li, *RSC Adv.* 2020, **10**, 8540-8547.
- 14 C. Echaide-Górriz, J. A. Zapata, M. Etxeberría-Benavides, C. Téllez and J. Coronas, *Sep. Purif. Technol.* 2020, **236**.
- 15 Y. Meng, L. Shu, L. Liu, Y. Wu, L. H. Xie, M. J. Zhao and J. R. Li, *J. Membr. Sci.* 2019, **591**, 117360.
